# Supplementary material for: A soft intelligent dressing with pH and temperature sensors for early detection of wound infection
Source: Royal Society of Chemistry journal article supplement (doi:10.1039/d1ra08375a), 2022-01-01
Supplement: d1ra08375a1.pdf [file d1ra08375a1.pdf]

## Appendix

### **A soft intelligent dressing with pH and temperature sensors for early detection of wound infection**

Zhiyang Zhang<sup>a,b,1</sup>, Rui Su<sup>b,c,1</sup>, Fei Han<sup>d,1</sup>, Zhiqiang Zheng<sup>b</sup>, Yuan Liu<sup>b</sup>, Xiaomeng Zhou<sup>d</sup>, Qingsong Li<sup>d</sup>, Xinyun Zhai<sup>e</sup>, Jun Wu<sup>f</sup>, Xiaohua Pan<sup>g</sup>, Haobo Pan<sup>b</sup>, Peizhi Guo<sup>c</sup>, Zhaoyang Li<sup>a</sup>, Zhiyuan Liu<sup>d,\*</sup>, Xiaoli Zhao<sup>b,\*</sup>

<sup>a</sup> School of Materials Science and Engineering, Tianjin Key Laboratory of composite and functional materials, Tianjin University, Tianjin 300350, PR China

<sup>b</sup> Research Center for Human Tissue and Organs Degeneration, Institute of Biomedicine and Biotechnology, Shenzhen Institutes of Advanced Technology Chinese Academy of Sciences, Shenzhen 518055, PR China

<sup>c</sup> Institute of Materials for Energy and Environment, State Key Laboratory of Bio-fibers and Eco-textiles, School of Materials Science and Engineering, Qingdao University, Qingdao 266071, PR China

<sup>d</sup> Neural Engineering Centre, Shenzhen Institute of Advanced Technology, Chinese Academy of Sciences, Shenzhen 518055, PR China

<sup>e</sup> Center for Rare Earth and Inorganic Functional Materials, School of Materials Science and Engineering, National Institute for Advanced Materials, Nankai University, Tianjin 300350, PR China

<sup>f</sup> Shenzhen Key Laboratory for Innovative Technology in Orthopaedic Trauma, The University of Hong Kong-Shenzhen Hospital, Shenzhen 518053, PR China

<sup>g</sup> Southern Medical University, Shenzhen Bao'an People's Hospital, Dept Orthoped & Traumatol, Shenzhen 518101, PR China

\* Corresponding author.

E-mail address: zhaoxltju@gmail.com (X. Zhao), zy.liu1@siat.ac.cn (Z. Liu)

<sup>1</sup> These authors contributed equally to this work.

**Table S1.** Comparison of flexible materials used in wound monitoring

| <b>Material</b> | <b>Thickness/<math>\mu\text{m}</math></b> | <b>Elastic modulus/<math>\text{N}/\text{mm}^2</math></b> | <b>Poisson's ratio</b> | <b>Reference</b> |
|-----------------|-------------------------------------------|----------------------------------------------------------|------------------------|------------------|
| PET             | 120                                       | 4000                                                     | 0.394                  | [1]              |
| bandage         | no shown                                  | no shown                                                 | no shown               | [2]              |
| PI              | 100*                                      | 3000                                                     | 0.34                   | [3]              |
| PDMS            | no shown                                  | no shown                                                 | no shown               | [4]              |
| <b>SEBS</b>     | <b>200</b>                                | <b>0.1</b>                                               | <b>0.3</b>             | <b>This work</b> |

\* by scale

**Table S2.** Comparison of flexible pH sensor used in wound monitoring

| <b>Materials</b> | <b>Sensitivity</b> | <b>R<sup>2</sup></b> | <b>reference</b> |
|------------------|--------------------|----------------------|------------------|
| PANI             | -50mv/pH           | 0.95                 | [5]              |
| PANI             | -60.34 mv/pH       | 0.999                | [3]              |
| PANI             | -57.037 mv/pH      | 0.998                | [4]              |
| PANI             | -50 mv/pH          | 0.973                | [6]              |
| PANI             | -65.9 mv/pH        | 0.998                | This work        |

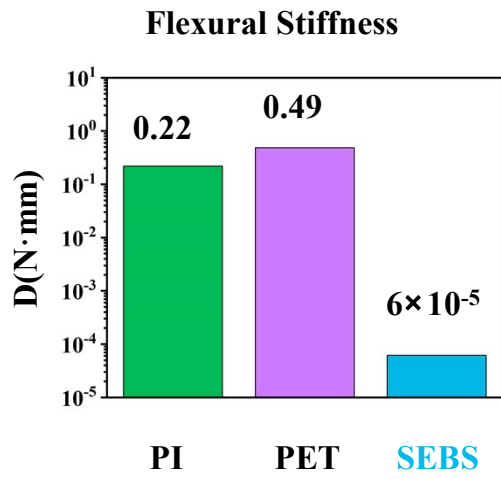

**Fig. S1.** Flexural stiffness of different materials applied to wound monitoring.

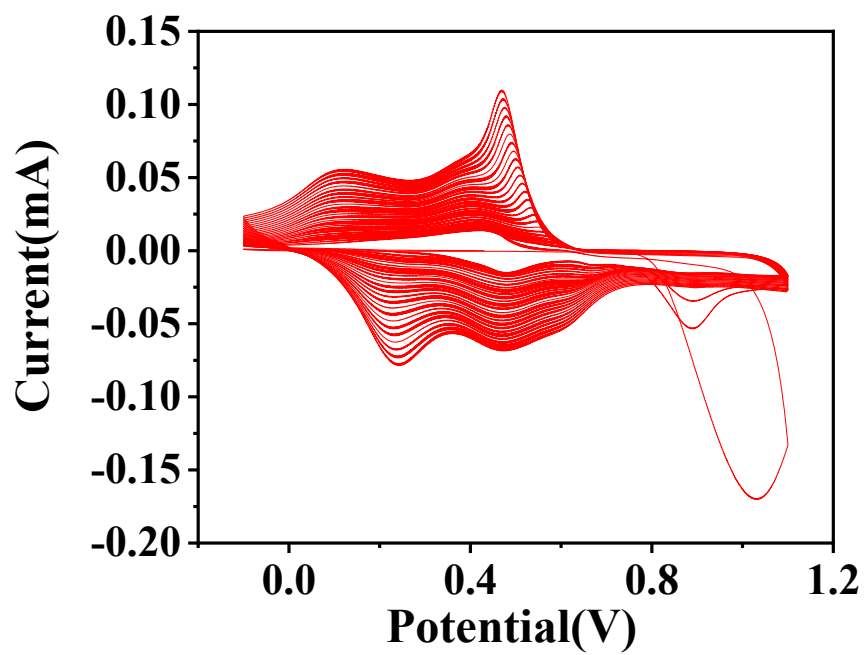

**Fig. S2.** Cyclic voltammetry of electrodeposited polyaniline (Voltage range is -0.5-1.1v, scanning rate is 50mv/s, Number of scanning turns is 25, Electrode area is 2×2mm).

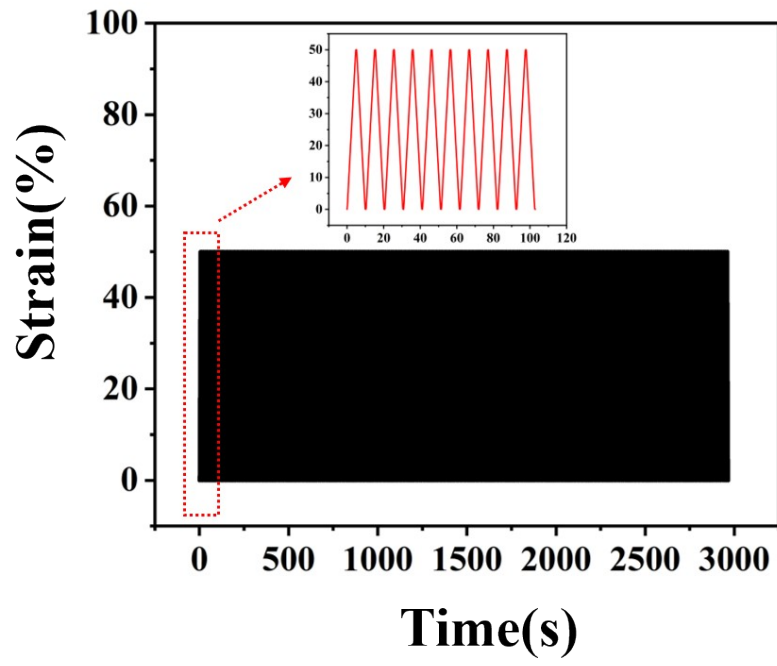

**Fig. S3.** pH sensor 50% tensile cycle 300 times.

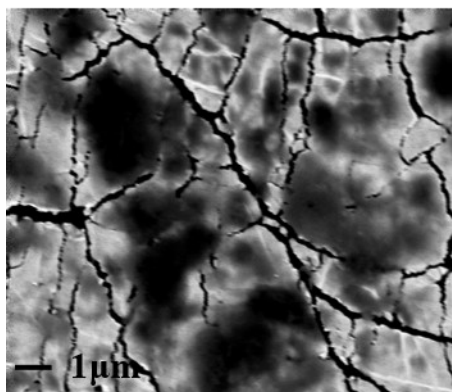

**Fig. S4.** SEM image of pH sensor after stretching

## Reference

- [1] Rahimi, R., Brener, U., Chittiboyina, S., Soleimani, T., Detwiler, D.A., Lelièvre, S.A., Ziaie, B., *Sens. and Actuators B Chem.*, 2018, 267, 198-207.
- [2] Kassal, P., Kim, J., Kumar, R., de Araujo, W.R., Steinberg, I.M., Steinberg, M.D., Wang, J., *Electrochem. commun.*, 2015, 56, 6-10.
- [3] Xu, G., Lu, Y., Cheng, C., Li, X., Xu, J., Liu, Z., Liu, J., Liu, G., Shi, Z., Chen, Z., Zhang, F., Jia, Y., Xu, D., Yuan, W., Cui, Z., Low, S.S., Liu, Q., *Adv. Funct. Mater.*, 2021, 29, 2100852.
- [4] Sharifuzzaman, M., Chhetry, A., Zahed, M.A., Yoon, S.H., Park, C.I., Zhang, S., Chandra Barman, S., Sharma, S., Yoon, H., Park, J.Y., *Biosens. Bioelectron.*, 2020, 169, 112637.
- [5] P. Mostafalu, A. Tamayol, R. Rahimi, M. Ochoa, A. Khalilpour, G. Kiaee, *Small* 2018, e1703509.
- [6] R. Rahimi, M. Ochoa, T. Parupudi, X. Zhao, I.K. Yazdi, M.R. Dokmeci, *Sens and Actuat B: Chem.*, 2016, 229, 609-617.
